# Supplementary material for: Colorimetry and phase transition characteristics in sensing fluoride anion based on hydrazide organogelators
Source: Royal Society of Chemistry journal article supplement (doi:10.1039/c7ra11650k), 2017-01-01
Supplement: c7ra11650k1.pdf [file c7ra11650k1.pdf]

## Supporting Information

# Colorimetry and Phase Transition Characteristics in Sensing Fluoride Anion Based on Hydrazone Organogelators

Xia Ran,<sup>a</sup> Qiongqiong Gao,<sup>a</sup> Yu Zhang<sup>\*,b</sup> and Lijun Guo<sup>\*,a</sup>

<sup>a</sup>Institute of Micro/Nano Photonic Materials and Applications, Henan University, Kaifeng 475004, People's Republic of China.

<sup>b</sup>Institute of Plant Stress Biology, Henan University, Kaifeng 475004, People's Republic of China.

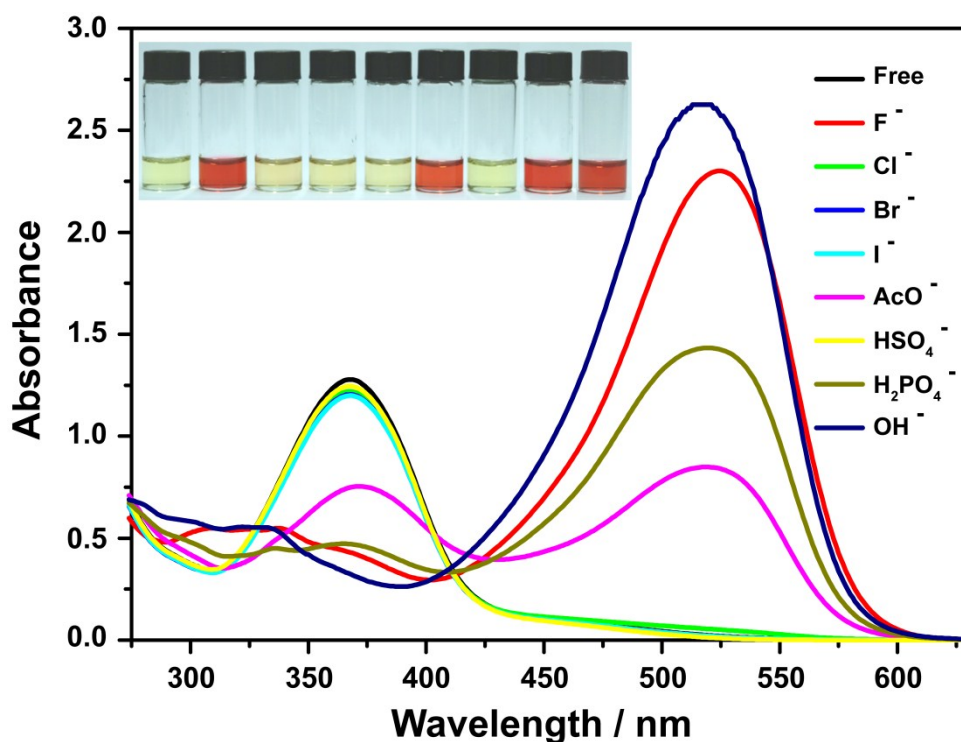

**Figure S1** UV-vis spectra of BNB-t4 ( $1 \times 10^{-4}$  mol L<sup>-1</sup>) in DMSO upon addition of 30 equiv. of various anions (F<sup>-</sup>, Cl<sup>-</sup>, Br<sup>-</sup>, I<sup>-</sup>, AcO<sup>-</sup>, HSO<sub>4</sub><sup>-</sup>, H<sub>2</sub>PO<sub>4</sub><sup>-</sup>, and OH<sup>-</sup>). Inset: the corresponding images of BNB-t4 in DMSO upon addition of 30 equiv. of various anions (from left to right: free, F<sup>-</sup>, Cl<sup>-</sup>, Br<sup>-</sup>, I<sup>-</sup>, AcO<sup>-</sup>, HSO<sub>4</sub><sup>-</sup>, H<sub>2</sub>PO<sub>4</sub><sup>-</sup>, and OH<sup>-</sup>).

<sup>\*</sup>To whom correspondence should be addressed. E-mail: qikelih@hotmail.com and juneguo@henu.edu.cn

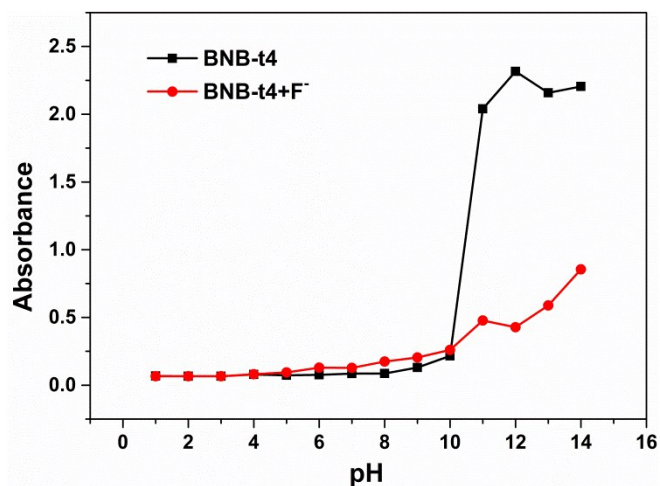

**Figure S2.** pH dependent absorbance of BNB-t4 at 485 nm with and without F<sup>-</sup> (40 equiv.).

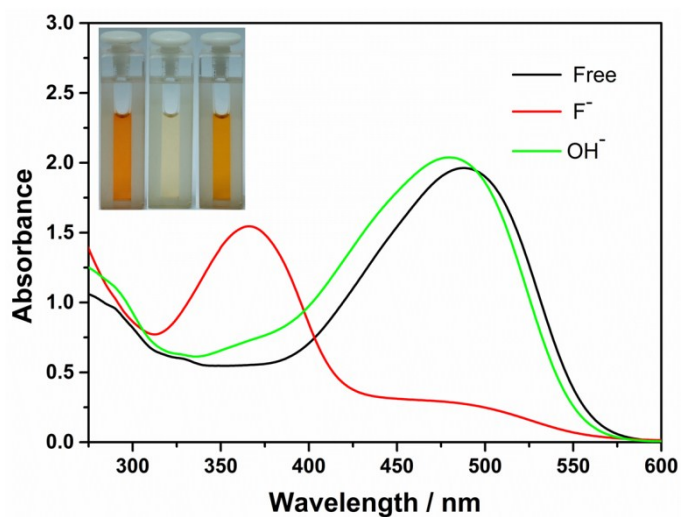

**Figure S3.** UV-vis spectra of BNB-t4 ( $1 \times 10^{-4}$  mol L<sup>-1</sup>) in HEPES buffer (pH=11) solution system upon addition of 40 equiv. of F<sup>-</sup> and OH<sup>-</sup>. Inset: the corresponding images of BNB-t4 ( $1 \times 10^{-4}$  mol L<sup>-1</sup>) in HEPES buffer (pH=11) upon addition of 40 equiv. of anions (from left to right: free, F<sup>-</sup> and OH<sup>-</sup>).

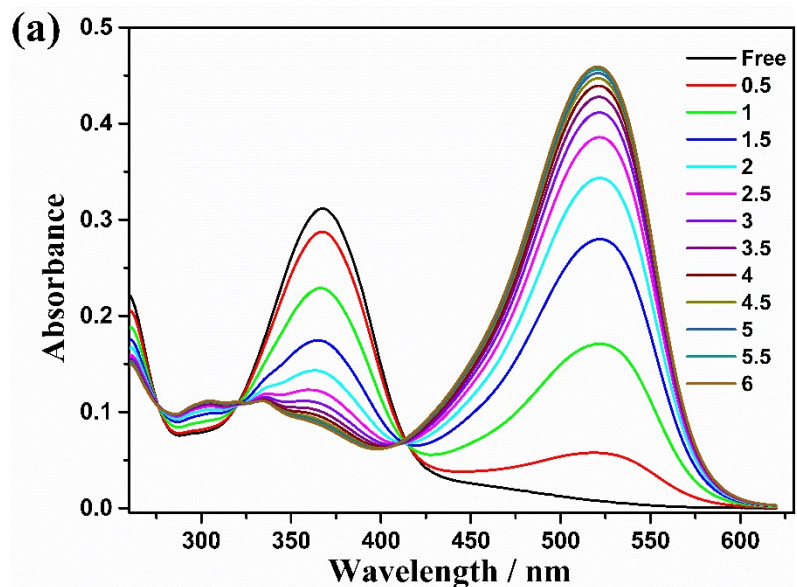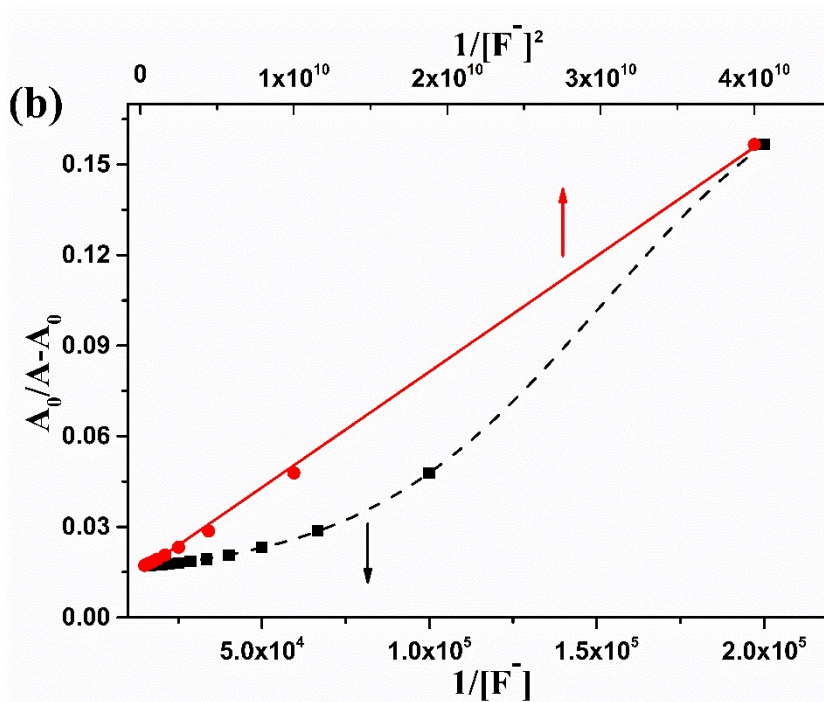

**Figure S4** (a) UV-vis absorption spectra of BNB-t4 ( $1 \times 10^{-5}$  M) in DMSO titrated with  $F^-$  (0-6 equiv.) (b) Benesi-Hildebrand plot for complexation of BNB-t4 with  $F^-$ .  $[F^-]$  is the concentration  $F^-$  added (M).

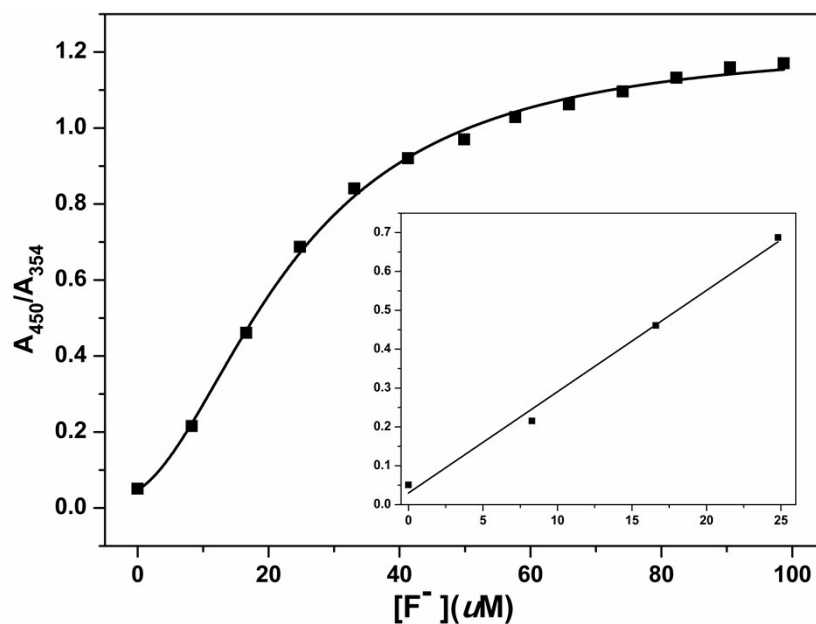

**Figure S5** Calibration curve of BNB-t4 ( $1 \times 10^{-5}$  M) in chloroform titrated with  $F^-$ . The curve was plotted with the absorbance ratio ( $A_{450}/A_{354}$ ) vs  $F^-$  concentration. Inset shows the linear responses at low  $F^-$  concentrations.

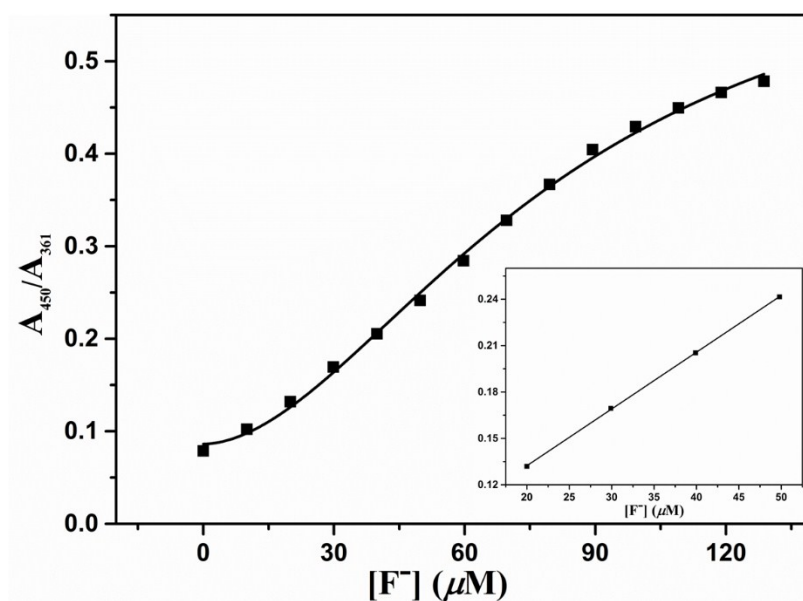

**Figure S6** Calibration curve of BNBC-t8 ( $1 \times 10^{-5}$  M) in chloroform titrated with  $F^-$ . The curve was plotted with the absorbance ratio ( $A_{450}/A_{361}$ ) vs  $F^-$  concentration. Inset shows the linear responses at low  $F^-$  concentrations.

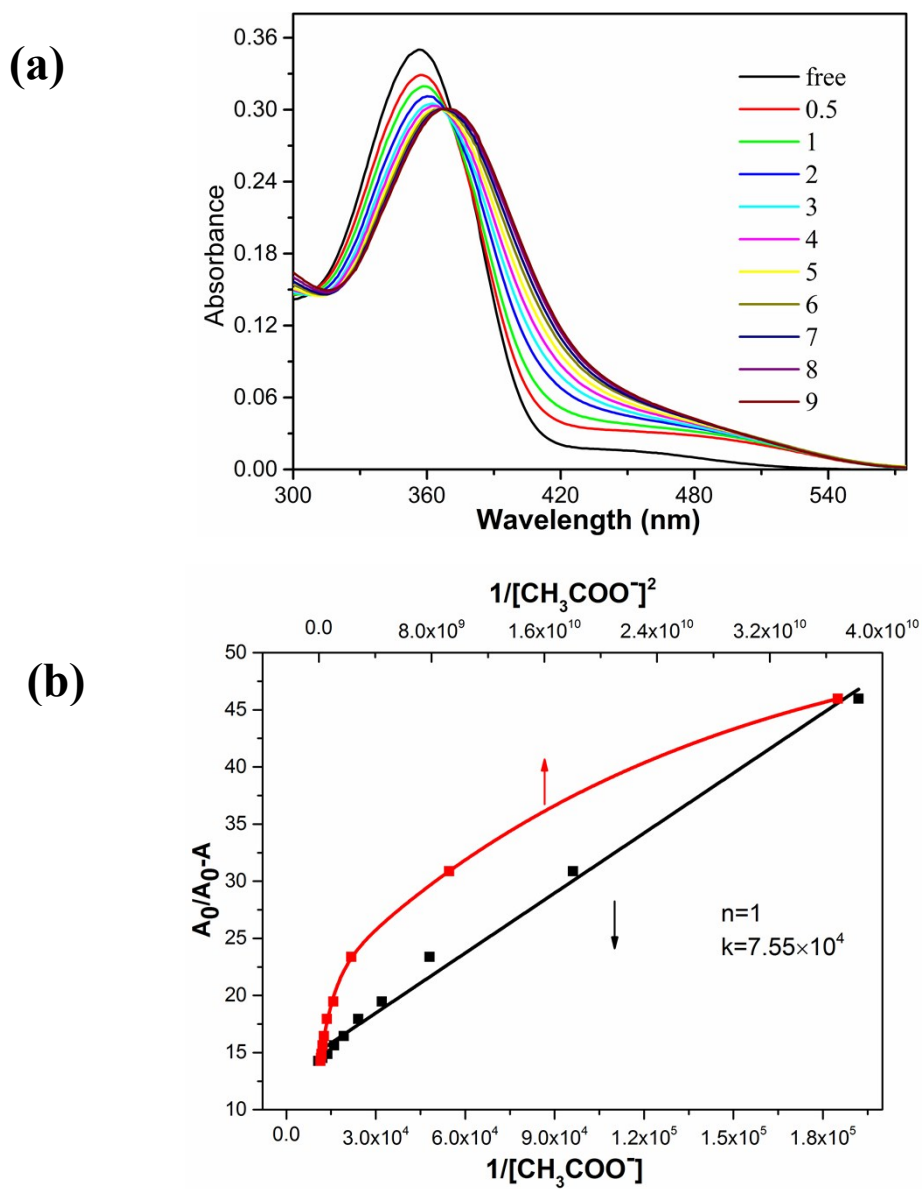

**Figure S7** (a) UV-vis absorption spectra of BNB-t4 ( $1 \times 10^{-5}$  M) in chloroform titrated with  $\text{CH}_3\text{COO}^-$  (0-9 equiv.) (b) Benesi-Hildebrand plot for complexation of BNB-t4 with  $\text{CH}_3\text{COO}^-$ .

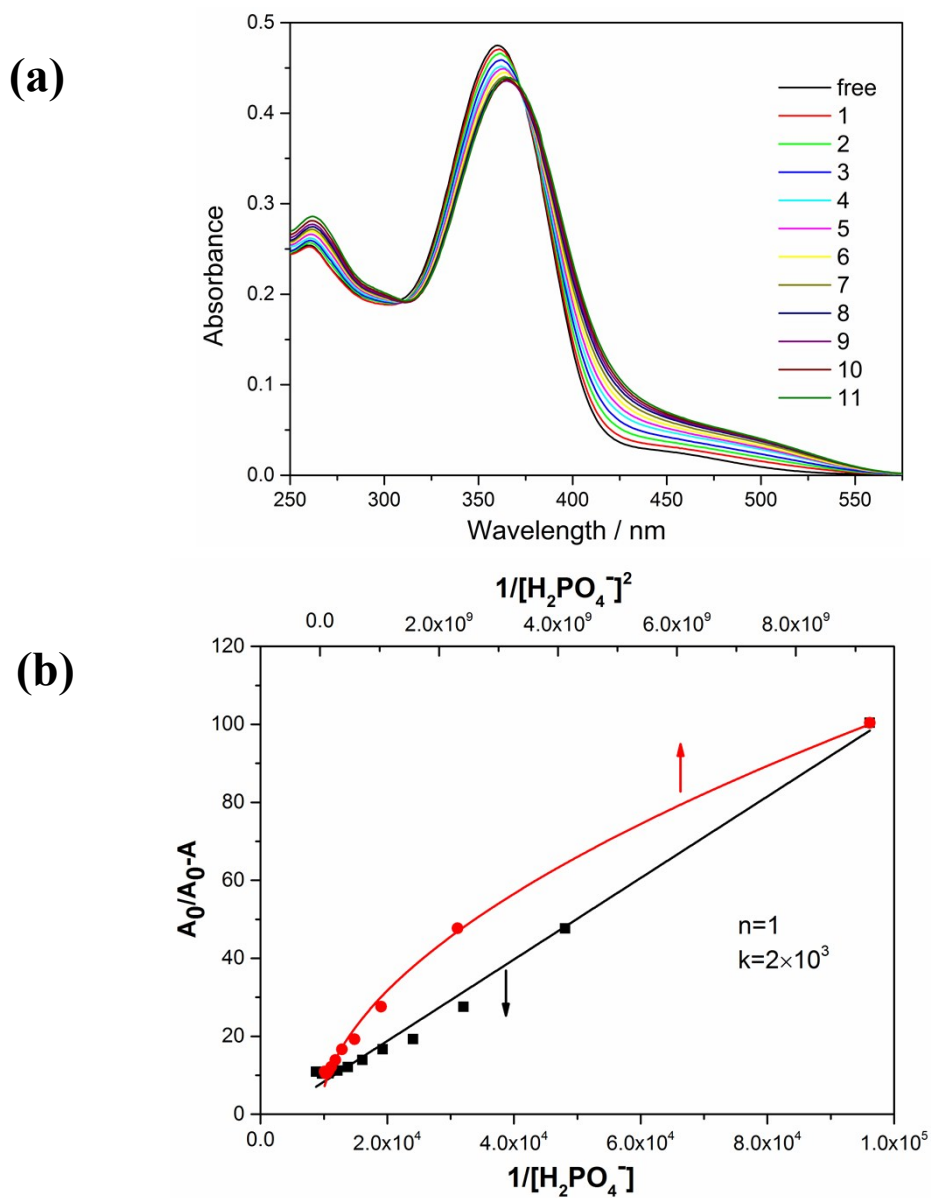

**Figure S8** (a) UV-vis absorption spectra of BNB-t4 ( $1 \times 10^{-5}$  M) in chloroform titrated with  $\text{H}_2\text{PO}_4^-$  (b) Benesi-Hildebrand plot for complexation of BNB-t4 with  $\text{H}_2\text{PO}_4^-$ .

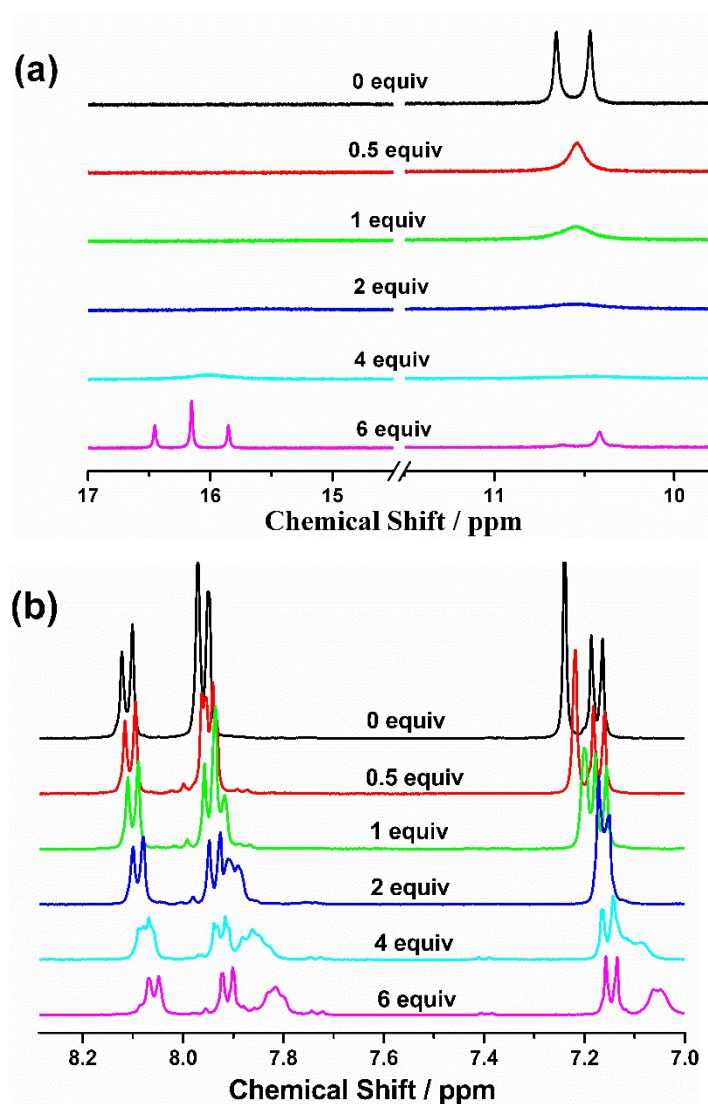

**Figure S9** The partial  $^1\text{H}$  NMR spectra of BNBC-t8 ( $1 \times 10^{-2} \text{ mol L}^{-1}$ ) in  $\text{DMSO-}d_6$  upon the addition of  $\text{F}^-$ .

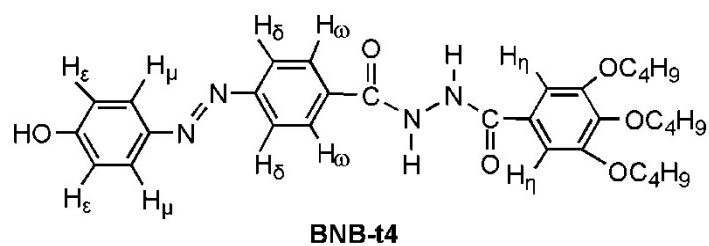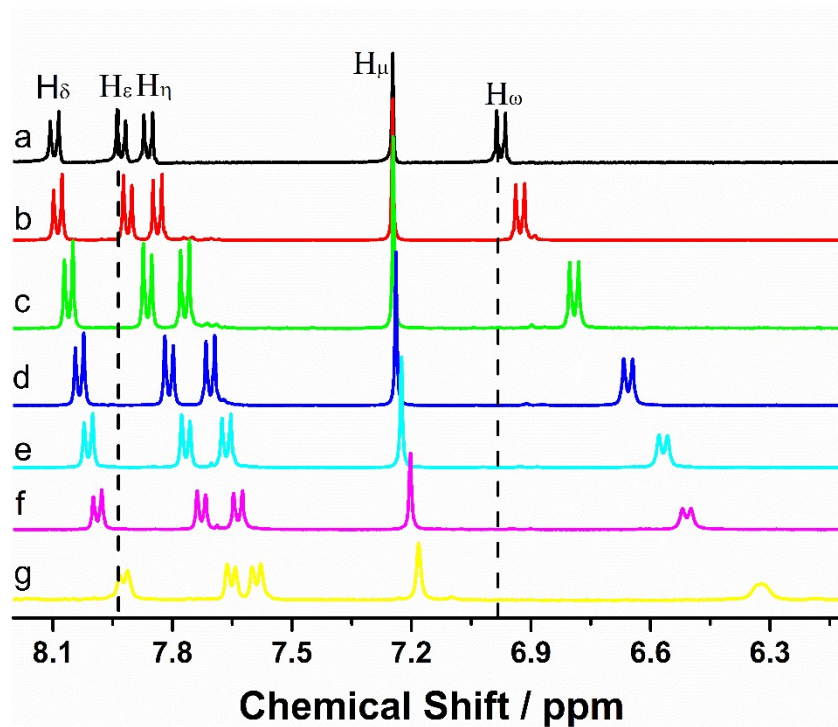

**Figure S10** Partial <sup>1</sup>H NMR spectra of BNB-t4 (5 mM) in DMSO-*d*<sub>6</sub> upon the addition of F<sup>-</sup> (a) free, (b) 0.5 equiv., (c) 2 equiv., (d) 4 equiv., (e) 6 equiv., (f) 8 equiv. and (g) 10 equiv.



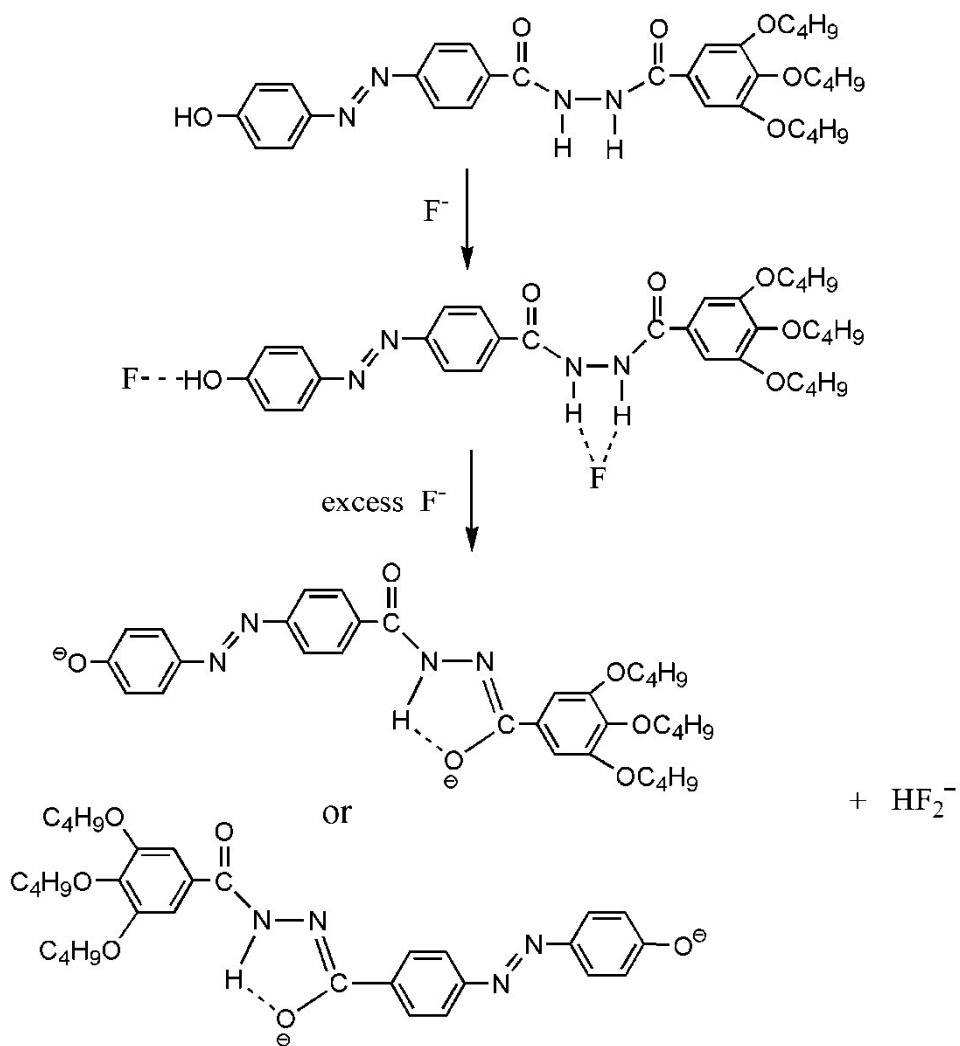

**Scheme S1** The probable mechanism for BNB-t4 to  $F^-$ .

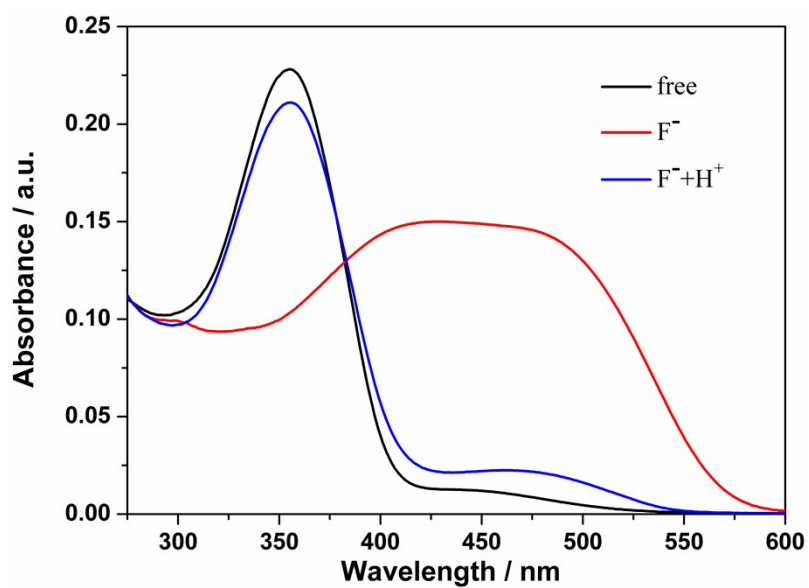

**Figure S11** UV-vis spectra of BNB-t4 ( $1 \times 10^{-5}$  mol L $^{-1}$ ) in chloroform, upon addition of 10 equiv. of F $^{-}$  (10 equiv.), and then added H $^{+}$  (such as HClO $_4$  or methanol) (10 equiv.).

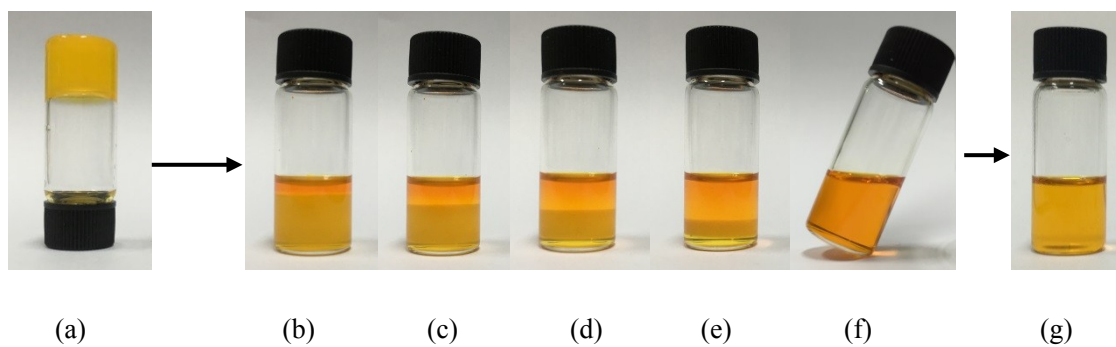

**Figure S12** Photographs of (a) the chloroform gel of BNB-t4 (8.0 mg/mL), (b) immediately after addition of solid tetrabutylammonium acetate (TBAA) (10 equiv.), (c) after 20 min, (d) after 40 min, (e) after 60 min, (f) after 88 min, (g) addition of 0.05 mL MeOH.

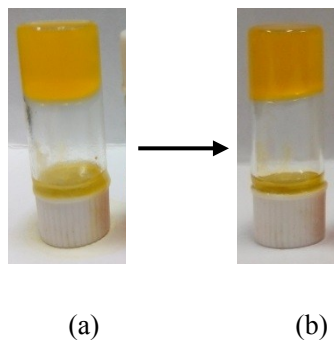

**Figure S13** Photographs of (a) the chloroform gel of BNB-t4 (8.0 mg/mL) (b) immediately after addition of solid tetrabutylammonium iodide (TBAI) (10 equiv.).

## Experimental Section

### Synthesis

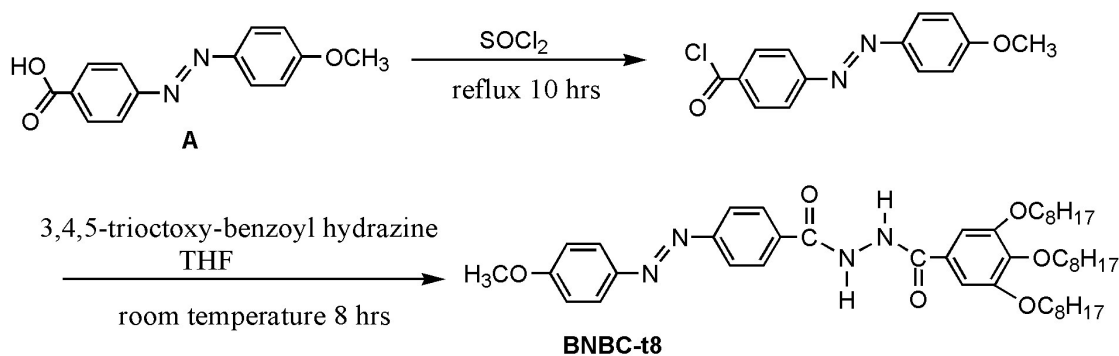

**Scheme S2.** Synthetic route for BNBC-t8.

The compound, N-(3,4,5-octanoxyphenyl)-N'-(4-(4-methoxyphenyl)azophenyl)benzohydrazide (BNBC-t8), was synthesized following the mechanism shown in Scheme S2.

4-(4'-methoxyphenyl)azobenzoic acid (A, 2.63 g, 0.01 mol) and thionyl chloride (50 mL) were refluxed for 10 h. 4-(4'-methoxyphenyl)azobenzoyl chloride was collected after removing unreacted thionyl chloride. 4-(4'-methoxyphenyl)azobenzoyl chloride was dissolved in tetrahydrofuran, 3,4,5-trioctoxybenzoyl hydrazine was added slowly, and the resulting mixture was stirred for 8 h. The resulting reaction mixture was poured into an excess

of ice water, and the precipitate was recrystallized from acetone.

$^1\text{H}$  NMR (400 MHz,  $\text{DMSO-}d_6$ ), (ppm, from TMS): 10.65 (s, 1H), 10.46 (s, 1H), 8.17–8.07 (d, 2H,  $J=8.08$ ), 8.03–7.87 (m, 4H), 7.24 (s, 2H), 7.21–7.13 (d, 2H,  $J=8.60$ ), 4.08–3.97 (m, 6H), 3.96–3.85 (m, 3H), 1.82–1.59 (m, 6H), 1.52–1.18 (m, 30H), 0.94–0.78 (m, 9H).

FT-IR (KBr, pellet,  $\text{cm}^{-1}$ ): 3334, 3237, 2927, 2856, 1666, 1638, 1586, 1550, 1498, 1465, 1427, 1390, 1328, 1253, 1180, 1122, 1029, 902, 841, 749, 723, 592, 555.

Elemental analysis: calculated for  $\text{C}_{45}\text{H}_{66}\text{N}_4\text{O}_6$  (%): C, 71.21; H, 8.76; N, 7.38. Found: C, 71.35; H, 8.87; N, 7.21.
